# Supplementary material
Source: HighWire-hosted journal article supplement (https://jech.bmj.com/content/71/4/344)
Supplement: inline-supplementary-material-1 [file inline-supplementary-material-1.pdf]

Supplementary fig 1. Flow chart describing the inclusion criteria of the participants

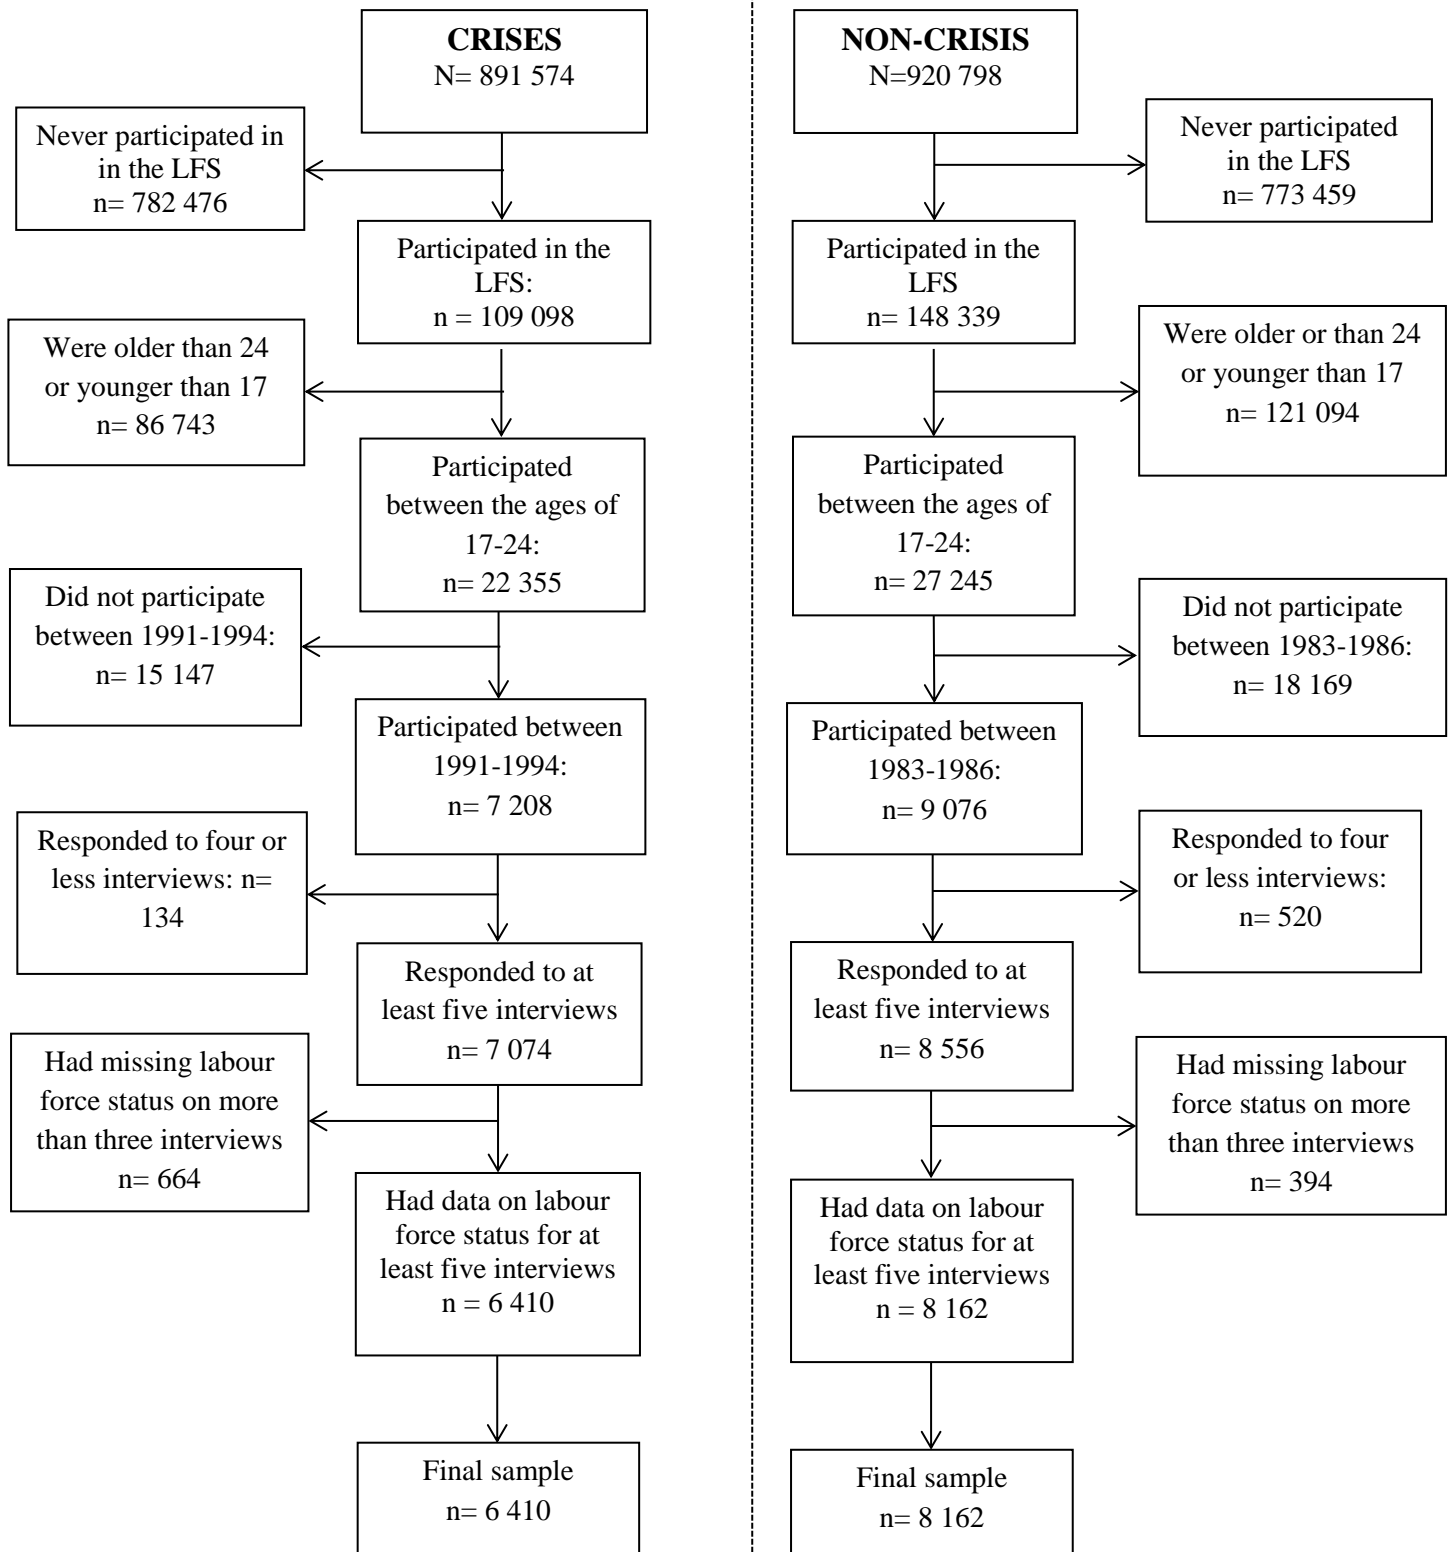

Supplementary Table 1. Sensitivity analysis excluding individuals with prior mental health problems (n=238), crude and adjusted hazard ratios (HRs) with 95% confidence intervals (CIs) for the associations between labour force status and mental diagnosis, stratified by cohort.

| Cohort                       | Crude HR<br>(95% CI) | Model 1<br>HR adjusted<br>(95% CI) | Model 2<br>HR adjusted<br>(95% CI) | Model 3<br>HR adjusted<br>(95% CI) | Number of<br>individuals with<br>mental health<br>diagnosis/number<br>of individuals (%) |
|------------------------------|----------------------|------------------------------------|------------------------------------|------------------------------------|------------------------------------------------------------------------------------------|
| <b>Crisis</b>                |                      |                                    |                                    |                                    |                                                                                          |
| Full-time worker (ref)       | 1.0                  | 1.0                                | 1.0                                | 1.0                                | 45/1683 (2.7)                                                                            |
| Unemployed                   |                      |                                    |                                    |                                    |                                                                                          |
| Less than 3 months           | 1.68 (1.13-2.50)     | 1.75 (1.16-2.63)                   | 1.76 (1.17-2.65)                   | 1.76 (1.17-2.65)                   | 53/1200 (4.4)                                                                            |
| 3-6 months                   | 2.47 (1.60-3.81)     | 2.58 (1.66-4.00)                   | 2.54 (1.63-2.65)                   | 2.54 (1.64-3.95)                   | 38/588 (6.5)                                                                             |
| More than 6 months           | 3.14 (1.96-5.04)     | 3.35 (2.08-5.41)                   | 3.16 (1.96-5.10)                   | 3.09 (1.91-5.00)                   | 28/343 (8.2)                                                                             |
| Economically inactive        | 0.92 (0.59-1.45)     | 0.94 (0.59-1.50)                   | 1.00 (0.62-1.60)                   | 1.02 (0.64-1.64)                   | 33/1385 (2.4)                                                                            |
| Unstable labour force status | 1.21 (0.77-1.87)     | 1.17 (0.74-1.84)                   | 1.19 (0.75-1.87)                   | 1.19 (0.75-1.88)                   | 35/1112 (3.2)                                                                            |
| <b>Non-crisis</b>            |                      |                                    |                                    |                                    |                                                                                          |
| Full-time worker (ref)       | 1.0                  | 1.0                                | 1.0                                | 1.0                                | 89/3403 (2.6)                                                                            |
| Unemployed                   |                      |                                    |                                    |                                    |                                                                                          |
| Less than 3 months           | 1.92 (1.38-2.66)     | 1.90 (1.36-2.65)                   | 1.87 (1.34-2.61)                   | 1.84 (1.32-2.58)                   | 59/1205 (4.9)                                                                            |
| 3-6 months                   | 3.14 (2.05-4.79)     | 3.06 (2.00-4.69)                   | 2.99 (1.95-4.58)                   | 2.91 (1.90-4.46)                   | 28/351 (8.0)                                                                             |
| More than 6 months           | 3.80 (2.20-6.56)     | 3.67 (2.12-6.36)                   | 3.46 (1.99-6.01)                   | 3.37 (1.94-5.87)                   | 15/158 (9.5)                                                                             |
| Economically inactive        | 1.07 (0.72-1.57)     | 1.08 (0.72-1.60)                   | 1.11 (0.74-1.66)                   | 1.12 (0.74-1.67)                   | 36/1329 (2.7)                                                                            |
| Unstable labour force status | 1.20 (0.85-1.71)     | 1.24 (0.87-1.78)                   | 1.26 (0.88-1.82)                   | 1.25 (0.87-1.79)                   | 49/1577 (3.1)                                                                            |

HR, hazard ratio; CI, 95% confidence interval

Crude analysis: unadjusted model

Model 1: adjusted for sex, age and country of birth

Model 2: additional adjustments for parental SEI and parental education

Model 3: additional adjustments for parents' mental health
